# Supplementary material
Source: PubMed Central journal article supplement (PMC4440865)
Supplement: NIHMS598946-supplement-01.pdf [file NIHMS598946-supplement-01.pdf]

**Supplemental Table 1.** Risk Factor Stratification and Predicted Lifetime Risk for Cardiovascular Disease in the Dallas Heart Study subjects (N= 2,998).

| Variable                                 | “Low Predicted Lifetime Risk for Cardiovascular Disease”<br>(N = 1,056) |                                 | “High Predicted Lifetime Risk for Cardiovascular Disease”<br>(N= 1,942) |                                 |                                 |
|------------------------------------------|-------------------------------------------------------------------------|---------------------------------|-------------------------------------------------------------------------|---------------------------------|---------------------------------|
|                                          | All Optimal RF<br>(N = 498)                                             | ≥ 1 Not Optimal RF<br>(N = 558) | ≥ 1 Elevated RF<br>(N = 401)                                            | 1 Major RF<br>(N = 1170)        | ≥2 Major RF<br>(N = 371)        |
| Systolic/Diastolic Blood Pressure (mmHg) | <120/<br><80                                                            | 120-139/<br>80-89               | 140-159/<br>90-99                                                       | ≥ 160/<br>≥ 100<br>(or treated) | ≥ 160/<br>≥ 100<br>(or treated) |
| Total Cholesterol (mg/dL)                | < 180                                                                   | 180-199                         | 200-239                                                                 | ≥ 240<br>(or treated)           | ≥ 240<br>(or treated)           |
| Diabetes Mellitus                        | No                                                                      | No                              | No                                                                      | Yes                             | Yes                             |
| Current Smoker                           | No                                                                      | No                              | No                                                                      | Yes                             | Yes                             |
| Predicted Lifetime Risk for CVD (Men)    | 5%                                                                      | 36%                             | 46%                                                                     | 50%                             | 69%                             |
| Predicted Lifetime Risk for CVD (Women)  | 8%                                                                      | 27%                             | 39%                                                                     | 39%                             | 50%                             |
